# Supplementary material for: Dual IRE1 RNase functions dictate glioblastoma development
Source: PubMed Central journal article supplement (PMC5840541; doi:10.15252/emmm.201707929), 2018-01-08
Supplement: EMMM-10-e7929-s001.pdf [file EMMM-10-e7929-s001.pdf]

## APPENDIX - Supplementary Files

### Table of Content

|                                            |       |                |
|--------------------------------------------|-------|----------------|
| <b>Supplementary Materials and Methods</b> | ----- | <b>Page 2</b>  |
| <b>Supplementary Tables</b>                | ----- | <b>Page 7</b>  |
| Table S1                                   | -     | Page 7         |
| Table S2                                   |       | Page 8         |
| Table S3                                   |       | Page 9         |
| Table S4                                   |       | Page 31        |
| Table S5                                   |       | Page 32        |
| Table S6                                   |       | Page 33        |
| Table S7                                   |       | Page 34        |
| Table S8                                   |       | Page 36        |
| <b>Supplementary Figure Legends</b>        | ----- | <b>Page 37</b> |
| <b>Supplementary References</b>            | ----- | <b>Page 40</b> |
| <b>Supplementary Figures</b>               | ----- | <b>Page 42</b> |
| Figure S1                                  |       | Page 42        |
| Figure S2                                  |       | Page 43        |
| Figure S3                                  |       | Page 44        |
| Figure S4                                  |       | Page 45        |
| Figure S5                                  |       | Page 46        |
| Figure S6                                  |       | Page 47        |
| Figure S7                                  |       | Page 48        |
| Figure S8                                  |       | Page 49        |

## **A) Supplementary Materials and Methods**

**Antibodies** – All the antibodies used in this study are described in **Appendix Table S8**.

**Biomass analysis (SRB)** - The SRB assay was performed as previously described (Vichai & Kirtikara, 2006). Briefly, cells were seeded into 96-well plates in 100  $\mu$ L at a density of 5000 cells/well. After cell inoculation, the plates were incubated at 37°C with 5% CO<sub>2</sub> for 24, to 96 hrs. Cell were then fixed *in situ* with trichloroacetic acid and stained with sulforhodamine B (Sigma). Absorbance was measured at 510 nm.

**Sphere formation and migration** - Sphere formation experiments were performed by incubating 5000 cells by well in a 96-wells plate previously coated with 50  $\mu$ l of 1.5% agar gel. For sphere dissociation/migration, spheres of the same size (obtained by incubating 5000 of each cell types for 48 hrs) were put on a 22-mm coverslip (Rempel, 2001) and incubated for 48 hrs. Then, spheres were fixed with 4% paraformaldehyde for 20 min at room temperature. Cell actin (phalloidin-FITC) and nucleus (Hoechst) were thus stained and visualized as previously described (Dejeans et al, 2012). Two parameters were measured: the size of the resulting sphere after 48 hrs of cell migration from the sphere, and the migrating distance of cells from the center of each sphere.

**In vitro IRE1-mediated RNA cleavage and systematic analysis of the cleavage sites** - Total RNA was extracted from U87 cells using Trizol reagent (Invitrogen, Carlsbad, CA, USA) and processed as: **1)** RNA was cleaved *in vitro* by recombinant IRE1 protein. The cleavage was repeated twice, using two different recombinant IRE1 (11905-H2OB, Sino Biological and E31-11G, SignalChem). The cleavage was performed for 4h at 37°C in 250 mM Tris pH 7.5, 100 mM NaCl, 5 mM MgCl<sub>2</sub>, 10 mM ATP, 0.33  $\mu$ g/ $\mu$ l mRNA and 1  $\mu$ g IRE1 protein per  $\mu$ g RNA. Alternatively, **2)** RNA was treated as for 1) in the absence of IRE1. PolyA and non-polyA RNA were then separated from the cleaved or uncleaved conditions using Dynabeads® mRNA DIRECT™ Purification Kit (Ambion) following provider's instructions. All steps were validated using RT-qPCR and RT-PCR against 3' or 5' specific primers of IRE1 mRNA targets (PER1 and XBP1) or against mRNA (GAPDH, B2M) and non-messenger RNA (18S ribosomal RNA, 7SK RNA, U1 spliceosomal RNA) (not shown). Biotinylated single strand cDNA was then prepared according to the WT AMBION kit manual RevD (4425209 RevD) from 250 ng total RNA and WTGene Affymetrix manual Rev7 (P/N 702808 Rev7). Following fragmentation and terminal labeling, 5.5  $\mu$ g of single strand cDNA were hybridized for 16h at 45°C on Affymetrix GeneChips. GeneChips were washed and stained in the Affymetrix Fluidics Station 450 with HWS kit and scanned using the Affymetrix

GeneChip Scanner 3000 7G. Data were generated with Affymetrix Expression Console v 1.2.1. The microarray platform utilized for the identification of potential targets of IRE1 *in vitro*, was the Affymetrix GeneChip Human Transcriptome Array (HTA) 2.0, which covers the whole exonic regions of the human genome, as well as junction regions between two adjacent exons. Four conditions were examined in total. The first one (A) included all Non-PolyA transcripts plus Non-PolyA fragments produced by PolyA transcripts that might be cleaved by IRE1. The second (B) included all PolyA transcripts plus PolyA fragments produced by potential cleavage from IRE1. The third condition (C) included all Non-PolyA transcripts and finally the fourth (D) referred to all PolyA transcripts. Two replicate samples for each condition were hybridized on Affymetrix array. All probes were arranged into probe sets that translated and summarized the data into gene-level, exon-level and splice-junction probe sets. The respective \*.CEL files, were processed by Affymetrix Expression Console Software (version 1.4; Build 1.4.1.46) (Affymetrix (2015) Affymetrix Expression Console Software (version 1.4; Build 1.4.1.46; [http://www.affymetrix.com/estore/browse/level\\_seven\\_software\\_products\\_only.jsp?productId=131414#1\\_1](http://www.affymetrix.com/estore/browse/level_seven_software_products_only.jsp?productId=131414#1_1)), selecting the Exon Level Analysis procedure. Raw probe intensities were summarized into PSR (Probe Selection Region) and Junction expression indices, using a standard procedure of GC background correction (Affymetrix (2005) Exon array background correction. [http://media.affymetrix.com/support/technical/whitepapers/exon\\_background\\_correction\\_whitpaper.pdf](http://media.affymetrix.com/support/technical/whitepapers/exon_background_correction_whitpaper.pdf)), median-scaling normalization (4), and median-polish summarization (GC-RMA) (5). Then, some kind of alternative splicing analysis for PSRs and junctions between the different conditions was conducted using the Affymetrix Transcriptome Analysis Console (TAC) (v3.0) ([http://www.affymetrix.com/estore/browse/level\\_seven\\_software\\_products\\_only.jsp?productId=prod760001#1\\_1](http://www.affymetrix.com/estore/browse/level_seven_software_products_only.jsp?productId=prod760001#1_1)) which permits visualization of data, depiction of expression changes at the gene and exon level as well as drill down into alternatively spliced exons. The presence of PSRs and junctions per sample was tested by DABG (Detection Above Background algorithm). An PSR/junction was expressed in a condition when  $\geq 50\%$  samples had  $DABG < 0.05$ . Intensity rates for any PSR or junction in a condition were computed using Tukey's Bi-weight Average Algorithm (Affymetrix (2002) Tukey's Bi-weight Average Algorithm ([http://media.affymetrix.com/support/technical/whitepapers/sadd\\_whitepaper.pdf](http://media.affymetrix.com/support/technical/whitepapers/sadd_whitepaper.pdf)) and were compared statistically between two experimental conditions using One-way Between-Subject ANOVA. Fold change cut-off was adopted at the level of 1.5-fold in linear-natural scale, with a parallel ANOVA p-value threshold of 0.05. Two complementary types of comparisons were performed and their overlapping findings were identified. Transcripts, whose PSRs and junctions were characterized as present or upregulated from a specific

PSR to their end, based on the 1<sup>st</sup> comparison (A versus C condition) but they were absent or downregulated based on the 2<sup>nd</sup> comparison (B versus D condition), respectively, were considered as potential targets of IRE1.

**Transcriptome analyses** – For cellular analyses, total RNA was extracted using the NucleoSpin RNA II, total RNA isolation kit (Macherey-Nagel, Düren, Germany), from U87EV, U87DN, U87WT, U87S769F, U87Q780\* cells. Samples were then analysed using Affymetrix arrays (kit HG U133+) at the Plateform “Puces à ADN THD” in Montpellier. The array intensity signals were analyzed fusing the libraries of Gene ARMADA software. Pre-processing was performed with the RMA method and the normalization was performed with the Quantile method. From the normalized values the Coefficient of Variation (CV) was estimated for each probe. In order to derive differentially expressed probes, the cells transfected with the empty vector represented the control category and statistical selection was based on the scaled CV method with the following criteria: fold change  $>|1|$  and  $CV_{scaled} > 2$ . In order to perform functional pathway analysis on the sets of differentially expressed genes, derived from the aforementioned statistical comparisons, we exploited the *BioInfoMiner* platform (Chatziioannou, 2011; Moutselos et al, 2010; Moutselos et al, 2011; Pilalis & Chatziioannou, 2013), which performs statistical and network analysis on various biological hierarchical vocabularies (Gene Ontology (GO) (Ashburner et al, 2000), Reactome pathways (Croft et al, 2013), the Human Phenotype Ontology (HPO) (Kohler et al, 2013) and MGI Mammalian Ontology (Eppig et al, 2015)) aiming to detect and rank significantly altered biological processes and the respective driver genes linking these processes. The *Bioinforminer* pipeline is available online at the website: <https://bioinforminer.com>. Hierarchical clustering was performed on the union of the differentially expressed probes from all the samples using complete linkage method and cosine distance metric.

For tumor analyses, a local cohort of 119 GBM patients treated with radiotherapy and concurrent/adjuvant temozolomide in accordance with the standard of care (GBMmark) was retrospectively recruited and used for transcriptome analysis. GBM specimens were obtained after informed consent from patients admitted to the neurosurgery department at Rennes University Hospital for surgical resection in accordance with the local ethic committee. Tumors used in this study were histologically diagnosed as grade IV astrocytoma according to the WHO criteria. Tumor samples were snap-frozen immediately after resection. All samples presented at least 70% of tumor cells. The extent of surgery was evaluated with an enhanced magnetic resonance imaging (MRI) performed within 24 hours after the resection. Total RNA was isolated with the NucleoSpin RNAII Kit (Macherey-Nagel, Hoerd, France). RNA integrity (RNA Integrity Number  $\geq 8$ ) was confirmed with an Agilent 2100 bioanalyzer (Agilent Technologies, Les Ulis, France). Gene expression profiling was

carried out with the Agilent whole human genome 8x60K microarray kit (Agilent Technologies). Total RNA was extracted, labelled and hybridized according to the kit manufacturer's recommendations. Raw intensity data were log<sub>2</sub>-transformed and normalized (intra-array and inter-array scaling) using *GeneSpring* software (Agilent Technologies). Student *t*-tests with a Welch approximation were used to compare expression values between conditions. Adjusted *p* values were calculated by controlling for the false discovery rate with the Benjamin i& Hochberg procedure. Genes were considered significantly differentially expressed if the *p* value was below 0.05. mRNA expression data were assessed from the publicly available GBM dataset of The Cancer Genome Atlas (TCGA) (Consortium et al, 2007; consortium, 2008) from the NCBI website platform <https://gdccportal.nci.nih.gov/>.

Patients were clustered according to IRE1 activity based on the normalized z-score of gene expression for the *BioInfoMiner* exported, signature of 38 genes (Figure S1). The z-score was calculated by the equation  $(X - m)/s$ , *X* stands for normalized log<sub>2</sub> expression data of each gene in each sample; *m* stands for mean of expression of each gene among all samples; and *s* stands for its respective, standard deviation. Raw data (\*.CEL files) of GSE27306 dataset (<https://www.ncbi.nlm.nih.gov/geo/query/acc.cgi?acc=GSE27306>) from Pluquet et al.,2013 were processed into R/Bioconductor according to the RMA normalization and Limma package (Ritchie et al, 2015). The differentially expressed genes (DEGs) between DN and WT U87 cells, were selected by setting a corrected P value threshold of 0.05 and fold change one of  $|\log_2(fc)| \geq 1.5$ . In this way, 1051 differentially expressed (D.E.) genes were derived, which were then introduced into *BioInfoMiner* and gene prioritization was executed exploiting the ontological vocabularies of four, different, functional and phenotypic databases; GO, Reactome, MGI and HPO, separately. Moreover, their annotations were corrected for potential, semantic inconsistencies of their schema, by adopting the "complete" choice (this version links the annotation of each gene with the ancestors of every direct correlated ontological term, thus restoring the flawless structure of ontological tree) whereas a hypergeometric p-value threshold of 0.05, was adopted. This yielded 227 highly prioritized genes, including their proximal interactors as the result of the union of the BioInfoMiner output from the four databases, 38 of which were cherry-picked as the intersection with the IRE1 signature of 97 genes identified in (Pluquet et al, 2013) (GSE27306). Overall, the *BioInfoMiner* signature comprised 19 highly up-regulated genes in WT versus DN U87 cells (*ASS1*, *C3*, *CCL20*, *COL4A6*, *CXCL2*, *CXCL5*, *CXCL8*, *IFI44L*, *IL1B*, *IL6*, *KCNN2*, *MMP1*, *MMP12*, *MMP3*, *PLA2G4A*, *PPP4R4*, *SERPINB2*, *TFPI2*, *ZNF804A*), and 19 highly down-regulated genes in WT versus DN U87 cells (*ANGPT1*, *CFH*, *CFI*, *CLEC3B*, *COL3A1*, *COL8A1*, *DACH1*, *DCN*, *FHL1*, *GAS1*, *LUM*, *OXTR*, *PLAC8*, *RGS4*, *TAGLN*, *TGFB2*, *THBS1*, *TIMP3*, *TMEM255A*). These two components of

BioInfoMiner signature were also used for the expansion of XBP1s and RIDD signature of 40 genes (**Fig 4B**) and 37 genes (**Fig 4G**), respectively, for the evaluation of XBP1s and RIDD activity in patients.

For each patient, each gene of the “XBP1s” and “RIDD” signature respectively, was initially assigned a quartile-oriented, gene score according to the level of its expression when contrasted to its complete expression distribution in the specific cohort. Each gene of the signature was rated with 1 when the z-score was  $\leq Q1$  (the first quartile; the 25th item of ordered data); with 2 when the z-score was  $>Q1$  AND  $\leq Q2$  (median); with 3 when the z-score was  $>Q2$  AND  $< Q3$  (the third quartile; the 75th item of ordered data) and with 4 when the z-score was  $\geq Q3$ . After quartile ranking, each patient was assigned an “XBP1s” and “RIDD” score based on the average of gene scores for XBP1s genes and RIDD genes, respectively. The median of “XBP1s” and “RIDD” patient score divided the specific cohort into four groups; XBP+, XBP1s- and RIDD+, RIDD- groups. Patients with XBP1s and RIDD score  $\geq Q3$  were collected as XBP1s high and RIDD low patients, respectively, and patients with XBP1s and RIDD score  $\leq Q1$  were collected as XBP1s low and RIDD high patients, respectively, for survival analysis. Patients were clustered according to IRE1, XBP1s and RIDD activities using hierarchical clustering, generated in R environment (R version 3.4.1 for windows) using the ComplexHeatmap R package (<https://github.com/jokergoo/ComplexHeatmap>). The euclidean, complete distance method was used for the grouping of GBM patients (TCGA and GBMmark) into four categories; XBP1s+/RIDD+, XBP1s+/RIDD-, XBP1s-/RIDD+ and XBP1s-/RIDD-, based on their patient score. Messenger RNA expression levels of immune (IBA1, CD14, CD45 and CD164), angiogenic (CD31, vWF) and invasive (RHOA, CYR61 and CTGF) markers were compared between high and low groups. mRNA expression was considered significantly differentially expressed if the *p*-value was below 0.05 using GraphPad Prism software.

**B) Supplementary tables**

|                                   | REACTOME TERM                                                                         | Number of DE Genes |       |       |       |      |      | Genes/<br>Term |
|-----------------------------------|---------------------------------------------------------------------------------------|--------------------|-------|-------|-------|------|------|----------------|
|                                   |                                                                                       | S769F              | Q780* | P336L | A414T | WT   | DN   |                |
| Extracellular matrix organization | Extracellular matrix organization                                                     | 8*                 | -     | 16**  | 33**  | 13** | 48** | 267            |
|                                   | Degradation of the extracellular matrix                                               | -                  | -     | 11**  | 13**  | 6*   | 23** | 118            |
|                                   | Syndecan Interactions                                                                 | 3*                 | -     | 4*    | -     | -    | -    | 27             |
|                                   | Collagen formation                                                                    | -                  | -     | 9**   | -     | -    | 15*  | 85             |
|                                   | Collagen degradation                                                                  | -                  | -     | 7*    | -     | -    | 12*  | 63             |
|                                   | Non-integrin membrane-ECM interactions                                                | -                  | -     | 6*    | -     | -    | -    | 59             |
|                                   | Integrin cell surface interactions                                                    | -                  | -     | 7*    | 12**  | -    | 18*  | 83             |
|                                   | Elastic fibre formation                                                               | -                  | -     | -     | 7*    | -    | -    | 44             |
|                                   | Laminin interactions                                                                  | -                  | -     | 4*    | 5*    | -    | -    | 30             |
| Signal Transduction               | Signaling by retinoic acid                                                            | -                  | -     | -     | -     | -    | 9*   | -              |
|                                   | Regulation of KIT signaling                                                           | -                  | -     | -     | 3*    | -    | -    | 12             |
|                                   | Gastrin-CREB signalling pathway via PKC and MAPK                                      | -                  | -     | -     | -     | 15*  | -    | 409            |
|                                   | G alpha (g) signalling events                                                         | -                  | -     | -     | -     | 8*   | -    | 187            |
| Homeostasis                       | Homeostasis                                                                           | -                  | -     | -     | 31*   | -    | 63*  | 521            |
|                                   | Common pathway of fibrin clot formation                                               | -                  | -     | -     | -     | 4*   | -    | 22             |
|                                   | Cell surface interactions at the vascular wall                                        | -                  | -     | 7*    | 9*    | -    | 15*  | 98             |
|                                   | Basigin interactions                                                                  | -                  | -     | 4*    | -     | -    | -    | 25             |
| Immune System                     | Interleukin-1 processing                                                              | -                  | 2*    | 3*    | 3*    | 3**  | -    | 7              |
|                                   | Interferon signaling                                                                  | -                  | -     | -     | -     | -    | 27*  | 180            |
|                                   | Endosomal/Vacuolar pathway                                                            | -                  | -     | -     | -     | -    | 7**  | 11             |
|                                   | Antigen Presentation:Folding, assembly and peptide loading of class I MHC             | -                  | -     | -     | -     | -    | 7*   | 25             |
|                                   | Trafficking and processing of endosomal TLR                                           | -                  | -     | -     | -     | -    | 5*   | 13             |
|                                   | Nucleotide-binding domain, leucine rich repeat containing receptor signaling pathways | -                  | -     | -     | -     | -    | 10*  | 51             |
| m of lipids and lipoproteins      | Bile acid and salt metabolism                                                         | -                  | -     | -     | 5*    | -    | -    | 34             |
|                                   | Synthesis of the bile acids and bile salts                                            | 3*                 | 3*    | 3*    | -     | -    | 7*   | 26             |
|                                   | Synthesis of Prostaglandins and Thromboxanes                                          | 2*                 | 2*    | -     | -     | -    | -    | 14             |
| m of vitamins                     | Retinoid metabolism and Transport                                                     | 3*                 | 3*    | -     | -     | -    | -    | 42             |
|                                   | Vitamin B1 metabolism                                                                 | -                  | -     | -     | 2*    | -    | -    | 4              |
| Metabolism of proteins            | Regulation of Insulin-like GF transport and uptake                                    | 2*                 | 2*    | -     | 4*    | -    | -    | 21             |
|                                   | Post-translational protein modification                                               | -                  | -     | -     | 23*   | -    | -    | 398            |
|                                   | Asparagine N-linked glycosylation                                                     | -                  | -     | -     | 14*   | -    | -    | 181            |

**Table S1:** Functional enrichment in signaling pathway as deduced from the transcriptome analysis. \* indicates  $p < 0.05$ ; \*\*  $p < 0.01$ . Values reflecting an even more significant enrichment were indicated in bold.

**Table S2:** XBP1s regulated genes based on transcriptome analyses

**XBP1s sign**

ANAPC10  
ARG2  
BAMBI  
CADPS2  
CCDC109B  
CD70  
CISD2  
COL5A2  
CSTA  
DKFZP564O0823  
DNAJB9  
DTNBP1  
EZR  
FAT  
FGF2  
FKBP11  
GALC  
GLUL  
HMGN3  
IL20RB  
LAYN  
LOC284561  
MAPKAP1  
NAP1L5  
NME5  
PAPSS2  
PGM3  
PPAPDC1B  
PPP1R14C  
PTER  
RNASE4  
SEC23B  
SEC24D  
SEC31A  
SERP1  
SLFN11  
SPCS3  
SRGN  
STOX2  
TMEM200A



Table S3: List of mRNA cleaved by IRE1 *in vitro*

| A#         | C            | D#           | G#         | KL            | MM        | O#        | R             | S         | T         | U#         |
|------------|--------------|--------------|------------|---------------|-----------|-----------|---------------|-----------|-----------|------------|
| AAK1       | C12orf73     | D4GLB        | G5C5       | KCAMB2        | MARL11    | O8C6N     | RAB30         | SBF2      | TAB1      | UBE2D3     |
| ABCA1      | C15orf41     | D8N1         | GALK1      | KCNH3         | MACF1     | OCM2      | RAB3GAP2      | SBF2-AS1  | TACC1     | UBE2F      |
| ABCA3      | C16orf89     | DCBLD2       | GALNT3     | KCNH4         | MAD1L1    | OLFM2B    | RABSA         | SCARB2    | TAF2      | UBE2G1     |
| ABCB4      | C17orf53     | DCKL1        | GANAB      | KCNJ5         | MAEA      | ORH1      | RABGEF1       | SCARNA13  | TAF9B     | UBE2Z      |
| ABCB9      | C1orf159     | DCTN2        | GATS13     | KCNJ9         | MAG2-AS3  | ORAOV1    | RAD17         | SCEL-AS1  | TAKO1     | UBE4A      |
| AB2        | C1QTNF9B     | DCNT5        | GBE1       | KCN51         | MAN2A1    | OSBPLA    | RAD50         | SCFD1     | TAKO3     | UBA2       |
| AC005550.5 | C2           | DDB2         | GCCR       | KCN8          | MANS1     | OSBPL2    | RAL14         | SCGN      | TARS      | UBA5       |
| AC007271.3 | C21orf67     | DDX3Y        | GGA2       | KIAA0195      | MADA      | OSMR      | RALGAP2A      | SCLY      | TAT       | UCKL1      |
| AC009158.1 | C2CD3        | DDX5         | GHTM       | KIAA0355      | MAP2K2    | OSTM1     | RANBP2        | SEC23A    | TBC1D12   | UFM1       |
| AC010880.1 | C3           | DD66L        | GIGYF2     | KIAA1033      | MAP3K10   | OTUD4     | RANRES1       | SEC23IP   | TBCID9    | UGSM       |
| AC023495.4 | C5orf42      | DGCR14       | GKS        | KIAA1109      | MAP3K14   | OTUD5     | RAS44         | SEC31A    | TBLXR1    | UGT2       |
| AC026559.2 | C7orf43      | DGQK         | GLB1       | KIAA1191      | MAP3K6    | OTUD7A    | RBI1          | SEC63     | TCOF1     | UHRF2      |
| ACAN       | C9orf117     | DHW9         | GLG1       | KIF1C         | MAP4K3    | OXCT1     | RBM33         | SEPN1     | TEC       | UCN20      |
| ACB05      | C9orf173     | DICER1       | GMFB       | KIF20A        | MAPK1     | OXR1      | RBCK1         | SELT      | TRDR9     | ULK4P1     |
| ACLY       | C9orf3       | DIRC2        | GNAQ       | KIF21A        | MAPK10    | PABPC1    | RBL1          | SEMA4D    | TECP1     | UNC13A     |
| AC01       | C9orf62      | DNFZP434K028 | GRB        | KIF21B        | MAPK1P1L  | PAP1      | RBM33         | SEPN1     | TEC       | UNC59      |
| ACTG1      | CA7          | DLEU2        | GNPTAB     | KIF2A         | MAPKAP1   | PAK2      | RBM39         | SENP6     | TENC1     | UNK        |
| ACVR1B     | CACNA2D4     | DLG1         | GOLGABA    | KIF5B         | MARCK2    | PAK4      | RCN1          | SEPT10    | TFDP1     | UPB1       |
| ACY2       | CADPS5       | DLG3         | GRN6B      | KIF6          | MARCK16   | PAM       | REFS1         | SEPT11    | TFE3      | URB1       |
| ADAM23     | CALM2        | DLGAP1       | GPR107     | KIR2D53       | MARCK4    | PAN3      | RFP2          | SEPT2     | TGFB1     | UROD       |
| ADAM9      | CALM3        | DMXL2        | GPR39      | KLF7          | MAR5      | PAPD4     | RFX3          | SETX      | THADA     | USMG5      |
| ADAMTSL2   | CANXD2       | DNAH14       | GPRO7      | KLHL20        | MAS22     | PADP5     | RFX7          | SF3B1     | THAP3     | USP24      |
| ADAMTSL1   | CANX         | DNAH17       | GRAMD1B    | KLHL23        | MAST3     | PAPOLA    | RGL2          | SH3BGR2   | THAP5     | USP34      |
| ADD1       | CAPN1        | DNAH5        | GRIK3      | KLHL24        | MATR3     | PARK7     | RGFP6         | SH3BGR2   | THOCS     | USP37      |
| ADRN1      | CAPRN2       | DNAJB4       | GRR4       | KLHL3         | MBNL2     | PARN      | RGS14         | SHR2      | THSD4     | USP3-AS1   |
| AH1        | CARKD        | DNAJC13      | GRN        | KMT2A         | MBNL3     | PARR4     | RIFI          | SHANK3    | TIAL      | USP4       |
| AHM1L      | CASC1        | DNASE1L1     | GRCR1      | KMT2E         | MBP25     | PCBP2     | RNF123        | SHF       | TIAP1     | USP43      |
| AK9        | CASP3        | DMBT1        | GATC       | KMT2A         | KMT2B     | PCAT      | RNF20         | SHLCL1    | TIPL      | USP45      |
| AKR1A1     | CASP7        | DNM1P47      | GSR        | KPNAS         | MCOLN1    | PCNL2     | RNF217        | SIN3B     | TLK1      | USP9X      |
| AKR1C1     | CAST         | DNMT1        | GTTF2      | KPTN          | MED1      | PCNL4     | NGT1          | SKIV2L2   | TLL2      | UVRR       |
| ALDH1L2    | CAV2         | DNT1         | GTTF2      | KIF5A         | HELB      | MIR1302-2 | MED13         | SKR11     | TLL2      | VAMP7      |
| ALDH3A2    | CEB3-AS1     | DP4          | GUCY1A     | KTN1          | MED15     | PCYOX1    | ROCK1         | SLAIN2    | TM95F4    | VEPH1      |
| AMMECR1    | CBDW1        | DPY19L3      | GUCY2F     | LAMA1         | MED23     | PCD10     | ROPNI         | SUC16A1   | TMED10    | VIM        |
| AMYL1B     | CBDW5        | DPD          | GUSBP9     | LAMA4         | MED9      | PCD2      | RPI1-118N.4   | SLC22A31  | TNFRF1    | VMO2       |
| ANAPC1     | CBD          | DPSY12       | H2AFZ      | LAMB4         | MFSO11    | PCDD6P    | RPI1-158R2.4  | SLC25A45  | TMEM131   | VMP1       |
| ANAPC1B    | CBX7         | DRAM1        | HCG21      | LAMTOR1       | MGAM      | POE8A     | RPI1-174G17   | SLC35A5   | TMEM161B  | VPS13A     |
| ANK3       | CCD1C3       | DSGAM        | HADG5      | LARP1         | MGMT      | POH4      | RPI1-188I6.2  | SLC28B1   | TMEM177   | VPS13C     |
| ANKRD13B   | CCD132       | DSE          | HADC9      | LARP7         | MICAL1    | PDILT     | RPI1-186D18.1 | SLC37A2   | TMEM181   | VPS41      |
| ANKRD28    | CCD149       | DSG2         | HECTD4     | LATS2         | MICB      | PODLY2    | RPI1-216N14.8 | SLC39A14  | TMEM209   | VTI1A      |
| ANKRD38    | CCD1C8       | DST          | HELB       | MIR1302-2     | HELB      | POSSA     | RPI1-217E22.5 | SLC41A3   | TMEM224   | VWHA1      |
| ANKRD36B   | CCD337       | DYNC1H1      | HERC2      | LCLAT1        | MIR143HG  | POSSA     | RPI1-244K5.4  | SLC6A8    | TMEM243   | VWHA2      |
| ANKK5      | CCD47        | ECHDC1       | HERC2P2    | LDB4          | MLVCD     | PKP       | RPI1-348F1.3  | SLC9A9    | TMEM30A   | WDR3       |
| ANKK5      | CCD50        | EDRF1        | HERC2P3    | LDB4          | MME       | PHC3      | RPI1-436F31.1 | SLC9C1    | TMEM31    | WDR44      |
| ANKK6      | CND3         | EHPB1        | HHEX       | LEPRE1        | MMP2      | PHF20L1   | RPI1-552M14.1 | SLK       | TMEM59    | WDR46      |
| ANKX8      | CNCL1        | EHPB1L1      | HEP1A      | LGALS1        | MON1A     | PKH6      | RPI1-767N15.1 | SLMAP     | TMEM87B   | WDR6       |
| ANKX8L2    | CCP51        | EPF3         | HLS1       | LOXN          | MORF4L2   | PKIB2     | RPI1-783C3.5  | SLTM      | TMEM88B   | WFC3C      |
| ADC1       | CCT3         | EF4E3        | HPK1       | LG4           | MOSPD1    | PIGT      | R4-613B23.1   | SMARCA1   | TMOD3     | WHSC1L1    |
| AP152      | CCTP3        | EF4EBP2      | HK2        | LILRA2        | MPOZ      | PIK3C3    | R5-1180C18.1  | SMARCC1   | TMPS515   | WNT5A      |
| AP3B1      | CCZ1B        | EIF5A        | HLA-A      | LINC00035     | MRP5      | PKR3B     | R6-7406.3     | SMARCC3   | TMPS56    | WWP1       |
| AP3K2      | CD008.1      | ELK3         | HLA-DPB1   | LINC00317     | MRP1      | PKR3B     | R6C4          | SMC4      | TNCC3     | XPNPEP1    |
| APCD11-AS1 | CD38         | ELMOD2       | HLA-DRA    | LINC00461     | MR3L3     | PITRM1    | RPL3          | SMC6      | TNC       | XPO1       |
| APP        | CD44         | ELVDL5       | HLA-DRB1   | LINC00559     | MR3H      | PITX2     | RPL31         | SMCHD1    | TNFRSF13B | XRC3       |
| APBBP2     | CD58         | ENPP1        | HLA-DREB3  | LINC00593     | MS1       | PITRM1    | RPL32         | SMIM24    | TNFRSF14  | XRC5       |
| APR2       | CCD428PA     | ENPP6        | HLA-H      | LINC00636     | MSM1      | PKD1      | RPL38         | SMURF1    | TNKS2     | YIPF6      |
| ARHGEF2    | CD5L         | EPAS1        | HMCN1      | LINC00649     | MTA3      | PKD2      | RPL41         | SNORA71E  | TNN       | YME1L      |
| ARHGAP18   | CD73         | EPH4E        | HMCN2      | LINC00893     | MTAF      | PKD1      | RPL42         | SNRNP50A  | TNCC2     | ZBED1      |
| ARHGAP26   | CDCA5        | EPH8         | HNRNPA1P10 | LINC00959     | MTHFD1    | PKIA      | RPS13         | SNX13     | TNNT2     | ZBTB22     |
| ARHGAP29   | CDCA7        | EPH7         | HNRNPK     | LIPA          | MTHFD2    | PLA2G4E   | RHN           | SNX29     | TNNT3     | ZBTB38     |
| ARHGAP9    | CDH1         | EPY          | HNRNPL     | LITAF         | MTRK2     | PLA2G4E   | RBM1          | SNX3      | TNFS      | ZDHHC20    |
| ARHGEF11   | CDH22        | ERBB2IP      | HNRNPU1    | LLGL1         | MTR7      | PLAA      | RNM3          | SORBS2    | TOLLIP    | ZEB1       |
| ARHGEF7    | CDK11A       | EKCC2        | HOXD10     | LINC01-AS1    | MYH10     | PLAT      | RBNL1         | SPAG1     | TOP1      | ZFAND6     |
| ARID2      | CDK12        | EKGC3        | HSD17B7    | LINC0132891   | MYH16     | PLA1      | RRC2          | SPARC     | TOP2B     | ZF394      |
| ARH2       | CDK19        | ERICH6       | HSP90B1    | LINC10042737  | MYH3      | PLD1      | RSCP1         | SPARCL1   | TOR1AIP1  | ZFP64      |
| ARL28P     | CDK4         | ERLIN2       | HSPA1B     | LINC100966291 | MYLK      | PLCE1     | RRTN          | SPATA21   | TOX       | ZFYE1      |
| ARMB8      | CDON         | ESRR2        | HSPA6      | MYO10         | MYO10     | RND2      | RUNX1T1       | SPATA31A5 | TPR3      | ZNF3       |
| ARVCF      | CEL          | ETFA         | HSPA8      | LINC101927641 | MYO15A    | PL3       | RYR2          | SPCS3     | TPR       | ZIC1       |
| ASMT1-AS1  | CELSR2       | EXOSC10      | HSPB1      | LINC101927768 | MYO15B    | PLS1      |               | SPR2      | TRAF3IP2  | ZNF131     |
| ASXL2      | CEP104       | EXT2         | HSPB11     | LINC101927943 | MYO3B     | PMF22     |               | SPR2      | TRAF3IP2  | ZNF131     |
| ATAD2B     | CEP112       | EXT2         | HSPG2      | LINC101927902 | MYO9B     | PMVK      |               | SPR1E1    | TRAPP3C   | ZNF22      |
| ATAD3A     | CEP63        | FABP3        | HUWE1      | LINC101928495 | MYT1L     | PKCK      |               | SPR1E1    | TRAP2     | ZNF227     |
| ATAD3C     | CEP62        | FADS1        | IDH3B      | NAAL5         | MYO10     | PKCK      |               | SPR1E1    | TRAP2     | ZNF227     |
| ATG2B      | CERS4        | FADS2        | JRFD1      | LINC101928978 | NAAG      | PMMA2     |               | SPR1E1    | TRAP2     | ZNF224     |
| ATIC       | CFB1B        | FAM114A1     | JRFD2      | LINC101929653 | NAMPT     | PNL8      |               | SOX1      | TRAP2     | ZNF280C    |
| ATM        | CFDP1        | FAM118A      | ITIL22     | LINC101930055 | NBEAL1    | PNL8      |               | SCSTN1    | SH2       | ZNF283     |
| ATMIN      | CHD2         | FAM13B       | IGHG2      | LINC283299    | NBEAL2    | POLL      |               | SRBD1     | TSP2      | ZNF331     |
| ATP1A1-AS1 | CHDH         | FAM13C       | IGHMBP2    | LINC340515    | NBN       | POM121C   |               | SRCIN1    | TSTA3     | ZNF365     |
| ATP1B3     | CHN          | FAM170B      | IKBKAP     | LINC644961    | NBP9      | PRKAB1    |               | SREK1     | TTCL3     | ZNF398     |
| ATP1B4     | CHMP5        | FAM199X      | IKBK8      | LINC645202    | NCL       | POU4F3    |               | SRP14     | TTCL1     | ZNF492     |
| ATP9V1B2   | CHN1         | FAM204A      | IKZF2      | LINC645355    | NCOA7     | PP1P5K2   |               | SRP22     | TTCC28    | ZNF503-AS1 |
| ATRN       | CHD9         | FAM209A      | IEST       | LINC645513    | NCOR1     | PP2R3C    |               | SRP9      | TTCC1     | ZNF529     |
| ATRX       | CKAP2L       | FAM89B       | IL6R       | LRBA          | NCSN      | PP2R3C    |               | SRX       | TTLL5     | ZNF555     |
| ATXN3      | CLASP2       | FAM98A       | IEST       | LRP2          | NDE1      | PP2R3C    |               | SRX       | TUBA1A    | ZNF672     |
| ATXN7L2    | CLASRP       | FAP          | ILR8       | LRRPRC        | NDRG3     | PP2R3D    |               | SRR1      | TXNDC11   | ZNF93      |
| AWAT2      | CLN5         | FAR5B        | ILK        | LRRC1         | NDST2     | PP2R3C    |               | STAG1     | TXNIP     | ZNF948     |
| B2M        | CLP2         | FAS          | INTS3      | LRRK2B        | NDUFA3    | PPR41     |               | STAG2     | TXNIP     | ZNF948     |
| B3GAT1     | CLN6         | FASN         | INTS6      | LRRK37A       | NDUFA5    | PKCC      |               | STEA2     | TXNIP     | ZNF948     |
| B3GNT2     | CLU          | FASTK        | IPOS       | LRRK37BP1     | NDUFA8    | RDM13     |               | STEA4     | TXNIP     | ZNF948     |
| B3GNT5     | CNBD1        | FAT2         | ITCH       | LRRK41        | NDUFB8    | PKA1A1    |               | STIL      | TXNIP     | ZNF948     |
| BACH1      | CNOT6        | FBLX3        | ITFG1      | LRRK45        | NEK1      | PKAG1     |               | STK10     | TXNIP     | ZNF948     |
| BARH1L     | CNPT2        | FBLX5        | ITGM       | LRRFP1        | NELL1     | PKAR1B    |               | STK3      | TXNIP     | ZNF948     |
| BS4        | COG6         | FBOX27       | ITGAV      | LRRK42        | NETO2     | PKAR2A    |               | STK9      | TXNIP     | ZNF948     |
| BS8        | COL11A1      | FBOX33       | ITGB1BP1   | LSM14A        | NF1       | PKCCI     |               | STMN3     | TXNIP     | ZNF948     |
| BS9        | COL11A2      | FBOX38       | ITGB1      | ITBP1         | NFE4      | PKRD3     |               | STG2      | TXNIP     | ZNF948     |
| BCAP31     | COL12A1      | FBN1         | ITHS       | ITPR2         | NFKB      | PKRD3     |               | STG2      | TXNIP     | ZNF948     |
| BCKDHB     | COL14A1      | FCGR2C       | ITPR2      | LUC7L3        | NFX1      | PKRG2     |               | STXB2     | TXNIP     | ZNF948     |
| BCLC7C     | COL15A1      | FCO2         | ITPR3      | LVS           | NG2       | PKRY      |               | STXB2     | TXNIP     | ZNF948     |
| BCCR       | COL18A1      | FESL14       | JUP        | LYRM1         | NBP2      | PKRY      |               | SUCCO     | TXNIP     | ZNF948     |
| BIRC6      | COL18A1-AS2  | FERM27       |            | LYST          | NIPSNAP1  | PROS1     |               | SUFCO     | TXNIP     | ZNF948     |
| B2M        | COL22A1      | FKBP15       |            |               | NKAIN4    | RPS2      |               | SULF1     | TXNIP     | ZNF948     |
| B3GNT1     | COL4A2       | FKBP7        |            |               | NLRP2     | PRK2C     |               | SUN2      | TXNIP     | ZNF948     |
| B3GNT2     | COL4A5       | FLI1         |            |               | NME1      | PSAP      |               | SVOP      | TXNIP     | ZNF948     |
| B3GNT5     | COL5A1       | FN1          |            |               | NNT       | PSMA7     |               | SYN2      | TXNIP     | ZNF948     |
| BACH1      | COL9A2       | FOXO3        |            |               | NOL8      | PSMB10    |               | SYT1      | TXNIP     | ZNF948     |
| BARH1L     | COPB1        | FOX2         |            |               | NONO      | PSMB5     |               | SYTL3     | TXNIP     | ZNF948     |
| BS4        | COPG2        | FRS1         |            |               | NOP58     | PSMD13    |               | SYTL3     | TXNIP     | ZNF948     |
| BS7        | COP5         | FRH9D2       |            |               | NOX5      | PTCH1     |               | SYTL3     | TXNIP     | ZNF948     |
| BS9        | COP5A        | FSCN3        |            |               | NP1A1     | PTK2      |               | SYTL3     | TXNIP     | ZNF948     |
| BCAP31     | CORO1C       | FXR1         |            |               | NP1       | PTK2B     |               | SYTL3     | TXNIP     | ZNF948     |
| BCL7C      | CPB-AS1      |              |            |               | NRF21-AS1 | PTM       |               | SYTL3     | TXNIP     | ZNF948     |
| BCCR       | CPEB2        |              |            |               | NRA5      | PTP4A2    |               | SYTL3     | TXNIP     | ZNF948     |
| BIRC5      | CPEB3        |              |            |               | NRD1      | PTPLA     |               | SYTL3     | TXNIP     | ZNF948     |
| BLM        | CPSF2        |              |            |               | NTSC      | PTPLB     |               | SYTL3     | TXNIP     | ZNF948     |
| BMS1       | CPSF6        |              |            |               | NTSDC2    | PTPN1     |               | SYTL3     | TXNIP     | ZNF948     |
| BNS1       | CPSF7        |              |            |               | NTNG1     | PTPN11    |               | SYTL3     | TXNIP     | ZNF948     |
| BPT1B      | CPT1B        |              |            |               | NB1       | PTPN14    |               | SYTL3     | TXNIP     | ZNF948     |
| BOD1L1     | CREB1        |              |            |               | NUCB2     | PTPRA     |               | SYTL3     | TXNIP     | ZNF948     |
| BOLA3      | CREB3L2      |              |            |               | NUDCD1    | PTPRK     |               | SYTL3     | TXNIP     | ZNF948     |
| BPI        | CREB1        |              |            |               | NUSAP1    | PTPRN     |               | SYTL3     | TXNIP     | ZNF948     |
| BPF        | CSNK1G3      |              |            |               |           | PTPRN     |               | SYTL3     | TXNIP     | ZNF948     |
| BRC2       | CSTF3        |              |            |               |           | PTPRQ     |               | SYTL3     | TXNIP     | ZNF948     |
| BRD7       | CTA-342B11.2 |              |            |               |           | PUM1      |               | SYTL3     | TXNIP     | ZNF948     |
| BTBD1      | CTB-174D11.2 |              |            |               |           | PUM2      |               | SYTL3     | TXNIP     | ZNF948     |
| BTNL1A1    | CTD-223503.3 |              |            |               |           | PUS3      |               | SYTL3     | TXNIP     | ZNF948     |
| BZWI       | CTNNB1       |              |            |               |           | PUS1L     |               | SYTL3     | TXNIP     | ZNF948     |
|            | C15orf117    |              |            |               |           | PWP2      |               | SYTL3     | TXNIP     | ZNF948     |
|            | C17orf53     |              |            |               |           | QARS      |               | SYTL3     | TXNIP     | ZNF948     |

**Table S4:** RIDD regulated genes (intersection of the list in S4 and genes upregulated in IRE1 DN cells)

**RIDD**

ADAM9  
ANXA5  
ARHGAP18  
ATG2B  
CALM1  
CALM2  
CALM3  
CAMK2D  
CASP7  
CAV2  
CDC42BPA  
CDC5L  
COPB2  
DHX9  
DST  
ENPP1  
FBXO38  
FERMT2  
HSPA1A  
HSPA1B  
IL1R1  
INTS6  
ITGAV  
KIF20A  
KLF7  
LARP7  
LGR4  
PRKD3  
RBBP9  
SPEF2  
TMOD3  
TNC  
TPR  
TROVE2  
TTC37  
UBE2D3  
ZNF22

**Table S5:** List of potential miR-17 regulated genes, in red are those exhibiting a miR-17 predicted binding site.

**miR17 sign**

BGLAP  
CD59  
CELSR2  
COL13A1  
DHRS2  
DIRAS3  
DKK3  
EFEMP1  
EXOSC6  
FGF14  
FOXF1  
GAP43  
GPR177  
GPR37  
IGFBP2  
KIAA0746  
KRTAP1-5  
LIFR  
LMO2  
LPPR4  
MAGEC1  
MAN1C1  
NDP  
NOS1  
NR2F1  
PCDH17  
PPL  
PROS1  
SHROOM3  
SLC14A1  
SLC1A1  
TMEFF2  
TNXA  
TSLP  
ZNF138  
ZNF20  
ZNF738  
ZNF85

**Table S6:** Primers used for site-directed mutagenesis

| Mutation (AA) | Sens | Primer sequence (5'-3')                      |
|---------------|------|----------------------------------------------|
| S769F         | FWD  | GCGTCTTTTACTACGTAATCTTTGAGGGCAGCCACCCTTTTGGC |
|               | REV  | GCCAAAAGGGTGGCTGCCCTCAAAGATTACGTAGTAAAAGACGC |
| Q780*         | FWD  | CCCTTTTGGCAAGTCCCTGTAGCGGCAGGCCAACATCC       |
|               | REV  | GGATGTTGGCCTGCCGCTACAGGGACTTGCCAAAAGGG       |
| P336L         | FWD  | ACAAGGGGGAGTGTGTGATCACGCTCAGCACGGACGTCAA     |
|               | REV  | TTGACGTCCGTCTGAGCGTGATCACACACTCCCCCTTGT      |
| A414T         | FWD  | CCAGACTTCAGAAAACACACCTACCACCGTGTCTCGGGA      |
|               | REV  | TCCCGAGACACGGTGGTAGGTGTGTTTTCTGAAGTCTGG      |

**Table S7:** RT-qPCR primers used in this study

|        | Sense | Primer sequence (5'-3')  |
|--------|-------|--------------------------|
| BiP    | FWD   | GCTTATGGCCTGGATAAGAGG    |
|        | REV   | CCACAACCTTCGAAGACACCAT   |
| Chop   | FWD   | ATTGACCGAATGGTGAATCTGC   |
|        | REV   | AGCTGAGACCTTTCCTTTTGTCTA |
| Col6A1 | FWD   | CCCTCGTGGACAAAGTCAAG     |
|        | REV   | GTTTCGGTCACAGCGGTAGT     |
| Edem   | FWD   | AGTCATCAACTCCAGCTGGAA    |
|        | REV   | AACCATCTGGTCAATCTGTCTG   |
| Erdj4  | FWD   | TGGTGGTTCCAGTAGACAAAGG   |
|        | REV   | CTTCGTTGAGTGACAGTCCTGC   |
| Gadd34 | FWD   | CCTCTACTTCTGCCTTGTCTCCAG |
|        | REV   | TTTTCTCCTTCTTCTCGGACG    |
| Grp94  | FWD   | TCCTCCTCCTGACGTTGTAAG    |
|        | REV   | TGCTCGCCATCTAGTACATCC    |
| Herpud | FWD   | CTATTCCGCCTTCTTGTAGC     |
|        | REV   | CCTCTTGGGTCAGCAATTACA    |
| Orp150 | FWD   | GAAGATGCAGAGCCCATTTC     |
|        | REV   | TCTGCTCCAGGACCTCCTAA     |
| Pdgfrb | FWD   | TCCATCCCTCTGTTCTCCTG     |
|        | REV   | CTGCCCTCTCCCAGTTATCA     |
| Per1   | FWD   | TATACCCTGGAGGAGCTGGA     |
|        | REV   | AGGAAGGAGACAGCCACTGA     |
| Scara3 | FWD   | CGCTGCCAGAAGAACCTATC     |
|        | REV   | AACCAGAGAGGCCAACACAG     |
| Sparc  | FWD   | GGCCTGGATCTTCTTTCTCC     |
|        | REV   | CCACCACCTCTGTCTCATCA     |
| Actin  | FWD   | CATGGGTGGAATCATAATGG     |
|        | REV   | AGCACTGTGTTGCGCTACAG     |
| Gapdh  | FWD   | AAGGTGAAGGTCGGAGTCAA     |
|        | REV   | CATGGGTGGAATCATAATGG     |
| FOXF1  | FWD   | CCCAGCATGTGTGACCGAAA     |
|        | REV   | ATCACGCAAGGCTTGATGTCT    |
| TSLP   | FWD   | TGCCTTAGCTATCTGGTGCC     |
|        | REV   | ACGCAACAATCCTTGTAAATTG   |
| PTEN   | FWD   | AGGGACGAACTGGTGTAAATGA   |
|        | REV   | CTGGTCCTTACTTCCCCATAGAA  |
| MAN1C1 | FWD   | CGATACCCTCTACCTCATGGAG   |
|        | REV   | CGCTCACGTTTCCAGGTGGAA    |
| LMO2   | FWD   | TCTGCCGGAGAGACTATCTCA    |
|        | REV   | ATAGGCACGAATCCGCTTGTC    |
| TGFB1  | FWD   | GTCAATGTACAGCTGCCGCA     |
|        | REV   | GTCAATGTACAGCTGCCGCA     |
| VIM    | FWD   | GACGCCATCAACAACGAGTT     |
|        | REV   | CTTTGTGCTTGGTTAGCTGGT    |
| ZEB1   | FWD   | GATGATGAATGCGAGTCAGATGC  |
|        | REV   | ACAGCAGTGTCTTGTGTTGT     |
| VEGFA  | FWD   | CGAACCCATGAACTTTCTGC     |
|        | REV   | CCTCAGTGGGCACACACTCC     |
| XBP1s  | FWD   | TGCTGAGTCCGCAGCAGGTG     |

|         |     |                          |
|---------|-----|--------------------------|
|         | REV | GCTGGCAGGCTCTGGGAAAG     |
| XBP1tot | FWD | CCTGGTTCTCAACTACAAGGC    |
|         | REV | AGTAGCAGCTCAGACTGCCA     |
| MMP-9   | FWD | ACCTCGAACTTTGACAGCGAC    |
|         | REV | GAGGAATGATCTAAGCCCAGC    |
| IRE1    | FWD | GCCACCCTGCAAGAGTATGT     |
|         | REV | ATGTTGAGGGAGTGGAGGTG     |
| CXCL2   | FWD | CTGCGCTGCCAGTGCTT        |
|         | REV | CCTTCACACTTTGGATGTTCTTGA |
| CCL2    | FWD | CAAGCAGAAGTG GGTTCAGGAT  |
|         | REV | TCTTCGGAGTTTGGGTTTGC     |
| IL6     | FWD | GGTACATCCTCGACGGCATCT    |
|         | REV | GTGCCTCTTTGCTGCTTTTAC    |
| IL8     | FWD | TGGCAGCCTTCCTGATTTCT     |
|         | REV | GGGTGAAAGGTTTGGAGTATG    |

**Table S8:** antibodies used in this study.

| <b>Antigen</b> | <b>Usage</b> | <b>Dilution</b> | <b>Company</b> | <b>Reference</b>                       |
|----------------|--------------|-----------------|----------------|----------------------------------------|
| CANX           | WB           | 1/1000          | N/A            | Chevet et al. EMBOJ (1999)             |
| XBP1s          | IHC          | 1/200           | N/A            | Lhomond et al. Meth. Mol. Biol. (2015) |
| VIM            | IHC          | 1/250           | DAKO           | M0-725 clone B9 11300                  |
| IBA1           | IHC          | 1/050           | WAKO           | 019-19741                              |
| CD31           | IHC          | 1/050           | DIANOVA        | DIA3105231                             |
| IRE1           | WB           | 1/1000          | SANTACRUZ      | H-190                                  |
| PDGFRB         | WB           | 1/1000          | SANTACRUZ      | 958                                    |
| P53            | WB           | 1/1000          | ABCAM          | DO-1                                   |
| ACTIN          | WB           | 1/1000          | ABCAM          | ab8227                                 |
| CD11b          | FACS         | N/A             | BD             | ICRF44                                 |
| CD45           | FACS         | N/A             | BD             | 2D1                                    |
| KDEL           | IF           | 1/250           | ABCAM          | ab12223                                |
| CD31           | FACS         | N/A             | BD             | WM59                                   |

### **A) Supplementary Figure legends**

**Figure S1: Bioinformatics workflow for the identification of 38-hub genes representative of the IRE1 signature.** Raw data (\*.CEL files) from the GSE27306 dataset (Pluquet et al, 2013) were processed into R/Bioconductor by using the RMA normalization and Limma package, and 1051 differentially expressed (D.E.) genes were selected between DN and WT U87 cells by using a corrected P value (pval) threshold of 0.05 and fold change threshold of  $|\log_2(\text{F.C.})| \geq 1.5$ . D.E. gene list was then introduced into the BioInfoMiner tool (see suppl. materials and methods) and gene prioritization was executed based on the biomedical ontologies of four different functional and phenotype databases including GO, Reactome, MGI and HPO, separately. For the annotation process was used the "complete" version (see materials and methods) and the hypergeometric pvalue threshold was set to 0.05. Two-hundred twenty-seven (227) highly prioritized genes including their proximal interactors corresponded to the union of the BioInfoMiner output from the four databases and 38 hub-genes were highlighted as the intersection with the IRE1 signature of (Pluquet et al, 2013).

**Figure S2: IRE1 signaling signature in the GBMmark cohort - A.** Hierarchical clustering of GBM patients (GBMmark cohort) based on high or low IRE1 activity as assessed with the expression of the IRE1 gene expression signature. **B.** Expression of microglial/monocyte/macrophage markers mRNA IBA1 in the IRE1<sup>high</sup> (red) and IRE1<sup>low</sup> (green) populations. **C.** Expression of angiogenesis marker mRNA CD31 in the IRE1<sup>high</sup> (red) and IRE1<sup>low</sup> (green) populations. **D.** Expression of the migration marker mRNA RHOA in the IRE1<sup>high</sup> (red) and IRE1<sup>low</sup> (green) populations. **E.** Gene expression analysis in the GBMmark cohort tumors exhibiting high (red) or low (green) IRE1 activity for targets of the three UPR arms: CHOP (PERK), ERDJ4, EDEM1 (IRE1) and ERO1LB (ATF6).

**Figure S3: Identification of somatic mutations in IRE1 in GBM. A.** Specific IRE1 exons sequencing flowchart: DNA was extracted from 23 gliomas samples provided by the Bordeaux Tumor Bank and IRE1 $\alpha$  exons sequences were compared to normal brain tissue IRE1 $\alpha$  sequence. One of the 23 samples showed a novel IRE1 $\alpha$  mutation, as indicated by the red arrow on DNA sequence representation. **B.** Tumor characterization from the 70 years-old female patient that presented the A414T mutation. Immunohistochemistry staining revealed a mesenchymal-like encapsulated tumor (Hematoxylin and eosin stain: HES), highly vascularized as indicated by CD31 staining of endothelial cells. IRE1 $\alpha$  activation within the tumor is visible by overexpression of the spliced form of XBP1 (XBP1s) in the tumoral tissue (T) compared to the non-tumoral tissue (NT). **C.** Sequence alignment of



IRE1 proteins reveals that Pro<sup>336</sup> and Ser<sup>769</sup> residues but not Ala<sup>414</sup> are well conserved in IRE1 proteins. Numbers refer to residue positions in human IRE1 protein (ERN1); *D. melanogaster*; *C. elegans*; *S. cerevisiae*. **D.** Three-dimensional reconstruction of human IRE1 domains (luminal and cytosolic) based on existing structures and positioning of the different mutations (those found in GBM are boxed in red).

**Figure S4: Functional analysis of IRE1 variants in U87 cells.** **A.** U87 were transduced with empty pCDH lentivector (EV) or with pCDH lentivector containing the WT (WT) or the mutated (S769F, Q780\*, P336L, A414T) IRE1alpha coding sequence and evaluated by immunoblot (anti-IRE1alpha and anti-actin). This revealed a 10-fold overexpression of full length (100kDa) IRE1alpha protein in WT, S769F, P336L and A414T conditions and over expression of a truncated (80kDa) IRE1alpha protein in Q780\* condition. **B.** Confocal immunofluorescence studies performed with U87 cells expressing these variant proteins showed co-localization of WT or mutated IRE1alpha (red) with the ER marker anti- KDEL (green). **C.** DSP-mediated in vivo cross-linking of IRE1 proteins in mutant expressing U87 cells. Anti-IRE1alpha immunoblot under both reduced (top) and non-reduced (bottom) revealed IRE1alpha oligomerization in basal conditions due to over expression of WT, P336L and A414T but not S769F nor Q780\* IRE1alpha variant proteins. **D.** EtBr-stained agarose gel of XBP1 cDNA amplicons corresponding to unspliced (XBP1u) and spliced (XBP1s) forms of XBP1 mRNA revealed XBP1 splicing in basal conditions or upon tunicamycin treatment (TUN, 5µg/mL for 6 hrs). **E.** The expression levels of miR-17-5p were quantified in IRE1 DN cells and IRE1 P336L expressing U87 cells exposed or not to the IRE1 RNase inhibitor MKC4485. Data are means ±SD. **F.** Expression of miR-17-5p in U87 cells expressing IRE1 variants under basal conditions (grey bars) or tunicamycin-induced stress (white bars). Data are the mean ±SD of 4 independent experiments.

**Figure S5: Phenotypic impact of the IRE1 variants in U87 cells.** **A.** Bar graph representing the doubling time of U87 population for each condition. **B.** Representative imaging of the sphere phenotypes at 6 hrs and 48 hrs post-seeding in agar coated well of a 96-well plate. The curve representation of the neurosphere size along 48 hrs did not reveal any significant differences in terms of cell aggregation and adhesion. Bar graphs represent the sphere size at 6 hrs post-seeding (top) and of the rate of sphere formation (bottom). All data shown are mean ± SEM of at least three biological replicates. **C.** Analysis of the KEGG pathway for glioma and annotated for component previously identified to be regulated (expression or activity) by IRE1 (yellow). **D.** Basal expression of PDGFRbeta and p53 in those experiments protein expression was standardized with Calnexin (CANX). **E.** Analysis

of p53 mRNA expression in U87 control (Empty vector – EV) or in cells expressing the IRE1 P336L variant.

**Figure S6: XBP1s in GBM tumors.** **A.** Heat map representation and functional clustering of GBM patients of the GBMmark cohort based on the XBP1s signature (**Table S2**). **B.** Immunohistochemical analysis of 24 GBM tumor sections using anti-XBP1s (blue) or anti IBA1 (black) antibodies.

**Figure S7: A.** Approach for identifying RNA substrates cleaved by IRE1 *in vitro*. **B.** Intersection of the list of RNA cleaved by IRE1 *in vitro* (**Table S4**) and that of mRNA whose expression is upregulated in IRE1 DN cells under basal conditions. **C.** Relative distribution of the different classes of GBM - proneural (blue), neural (orange), classical (green), and mesenchymal (red) according to the tumor status, namely XBP1+/RIDD-; XBP1+/RIDD+; XBP1-/RIDD+; XBP1-/RIDD-. **D.** Correlation between the XBP1+ tumor groups in the TCGA RNAseq cohort and the presence of identified reads corresponding to the spliced XBP1. **E.** Kaplan-Meier survival curves of XBP1s<sup>high</sup>/RIDD<sup>low</sup> (red), XBP1s<sup>high</sup>/RIDD<sup>high</sup> (grey), XBP1s<sup>low</sup>/RIDD<sup>low</sup> (blue) and XBP1s<sup>low</sup>/RIDD<sup>high</sup> GBM tumor patients of both TCGA cohorts (microarrays (left) and RNAseq (right)).

**Figure S8: Characterization of the IRE1-modified primary GBM lines.** **A.** Expression levels (as determined using RT-qPCR; n = 3 per clone) of IRE1 mRNA in parental RNS85, 87, 96 and 130 and in the same lines overexpressing IRE1 WT or IRE1 Q780\*. **B.** Phase contrast pictures of the primary lines expressing or not IRE1 WT or IRE1 Q780\*.

## **B) Supplementary References**

Ashburner M, Ball CA, Blake JA, Botstein D, Butler H, Cherry JM, Davis AP, Dolinski K, Dwight SS, Eppig JT et al (2000) Gene ontology: tool for the unification of biology. The Gene Ontology Consortium. *Nat Genet* 25: 25-29

Chatziioannou AaM, P. (2011) Exploiting statistical methodologies and controlled vocabularies for prioritized functional analysis of genomic experiments: the StRAnGER web application. *Front Neurosci* 5: 8

Consortium EP, Birney E, Stamatoyannopoulos JA, Dutta A, Guigó R, Gingeras TR, Margulies EH, Weng Z, Snyder M, Dermitzakis ET et al (2007) Identification and analysis of functional elements in 1% of the human genome by the ENCODE pilot project. *Nature* 447: 799-816

consortium T (2008) Comprehensive genomic characterization defines human glioblastoma genes and core pathways. *Nature* 455: 1061-1068

Croft D, Mundo AF, Haw R, Milacic M, Weiser J, Wu G, Caudy M, Garapati P, Gillespie M, Kamdar MR et al (2013) The Reactome pathway knowledgebase. *Nucleic Acids Res* 42: D472-477

Dejeans N, Pluquet O, Lhomond S, Grise F, Bouche-careilh M, Juin A, Meynard-Cadars M, Bidaud-Meynard A, Gentil C, Moreau V et al (2012) Autocrine control of glioma cells adhesion and migration through IRE1 $\alpha$ -mediated cleavage of SPARC mRNA. *J Cell Sci* 125: 4278-4287

Eppig JT, Richardson JE, Kadin JA, Ringwald M, Blake JA, Bult CJ (2015) Mouse Genome Informatics (MGI): reflecting on 25 years. *Mamm Genome* 26: 272-284

Kohler S, Doelken SC, Mungall CJ, Bauer S, Firth HV, Bailleul-Forestier I, Black GC, Brown DL, Brudno M, Campbell J et al (2013) The Human Phenotype Ontology project: linking molecular biology and disease through phenotype data. *Nucleic Acids Res* 42: D966-974

Moutselos K, Maglogiannis I, Chatziioannou A (2010) Delineation and interpretation of gene networks towards their effect in cellular physiology- a reverse engineering approach for the identification of critical molecular players, through the use of ontologies. *Conf Proc IEEE Eng Med Biol Soc (EMBC) 2010*: 6709-6712

Moutselos K, Maglogiannis I, Chatziioannou A (2011) GOrevenge: A novel generic reverse engineering method for the identification of critical molecular players, through the use of ontologies. *IEEE Trans Biomed Eng*

Pilalis E, Chatziioannou A (2013) Prioritized functional analysis of biological experiments using resampling and noise control methodologies. *IEEE 13th International Conference on "Bioinformatics and Bioengineering (BIBE)*: 10-13

Pluquet O, Dejeans N, Bouche-careilh M, Lhomond S, Pineau R, Higa A, Delugin M, Combe C, Lorient S, Cubel G et al (2013) Posttranscriptional regulation of PER1 underlies the oncogenic function of IRE $\alpha$ . *Cancer Res* 73: 4732-4743

Rempel SA (2001) Molecular biology of nervous system tumors. *Hematol Oncol Clin North Am* 15: 979-1006

Ritchie ME, Phipson B, Wu D, Hu Y, Law CW, Shi W, Smyth GK (2015) limma powers differential expression analyses for RNA-sequencing and microarray studies. *Nucleic Acids Research* 43: e47

Vichai V, Kirtikara K (2006) Sulforhodamine B colorimetric assay for cytotoxicity screening. *Nat Protoc* 1: 1112-1116

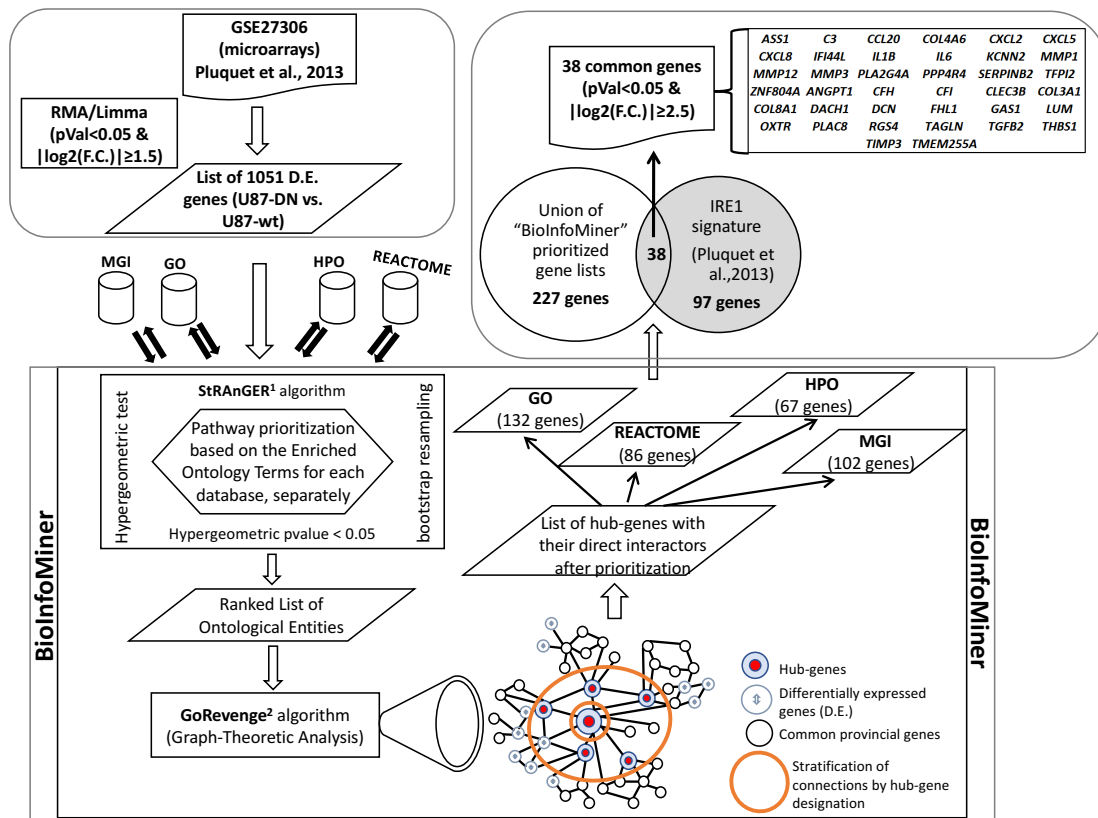

Figure S1

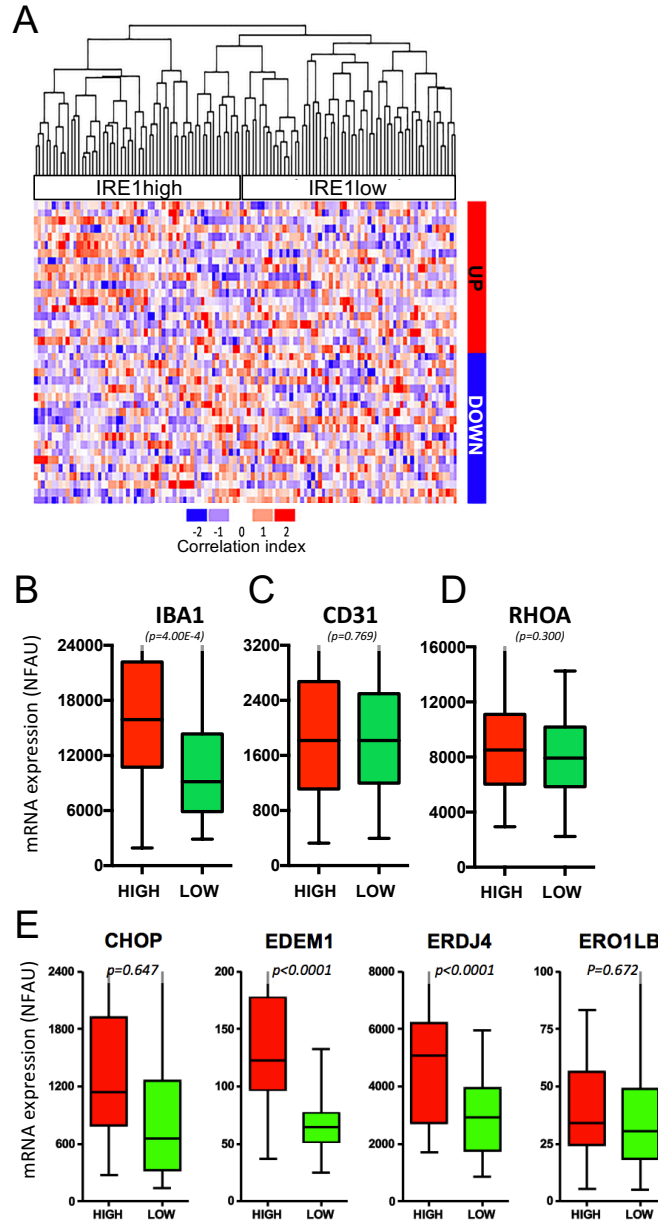

Figure S2

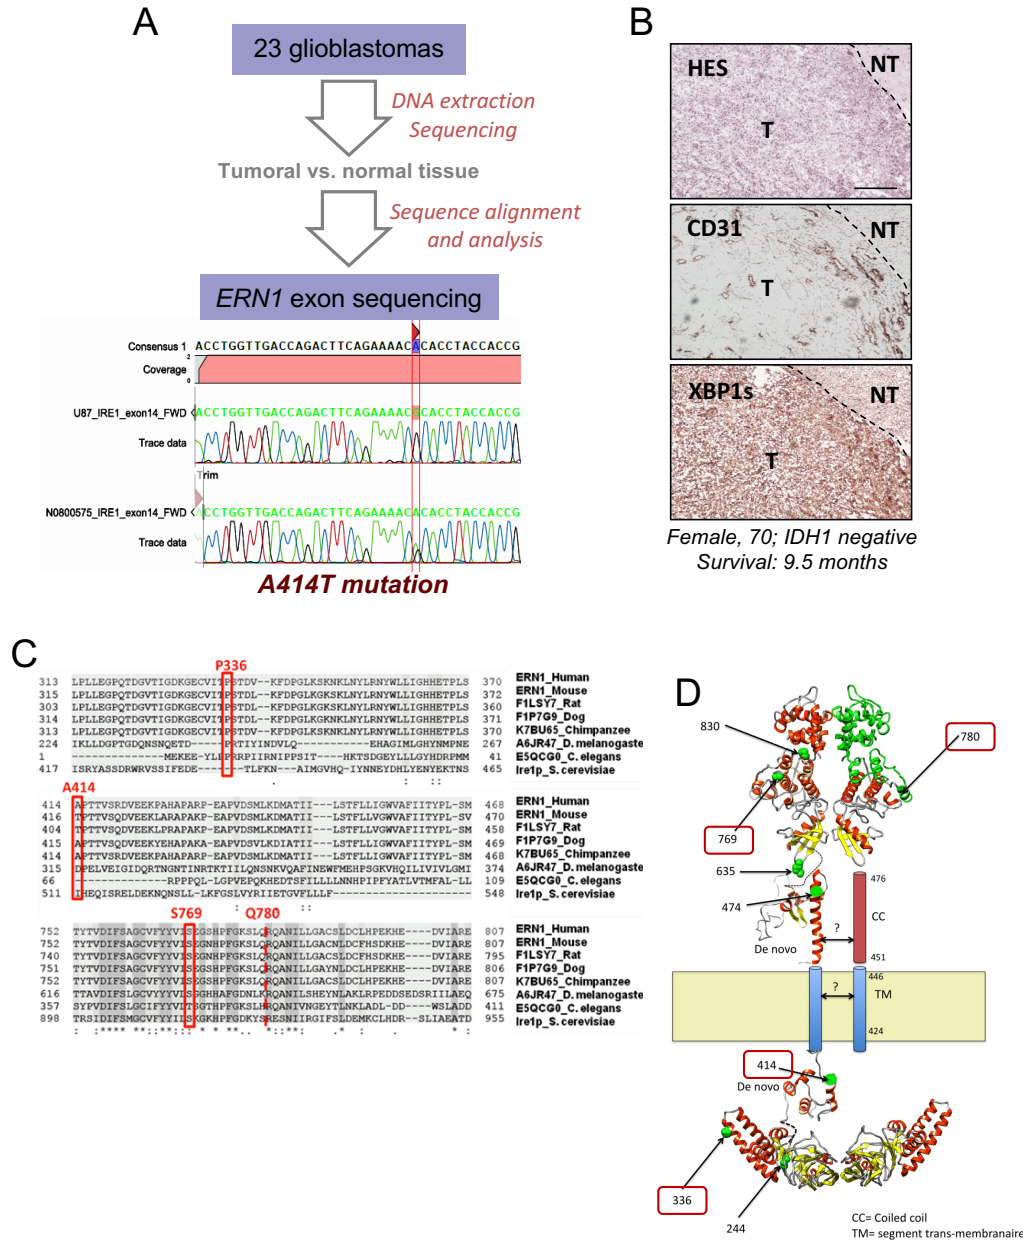

Figure S3

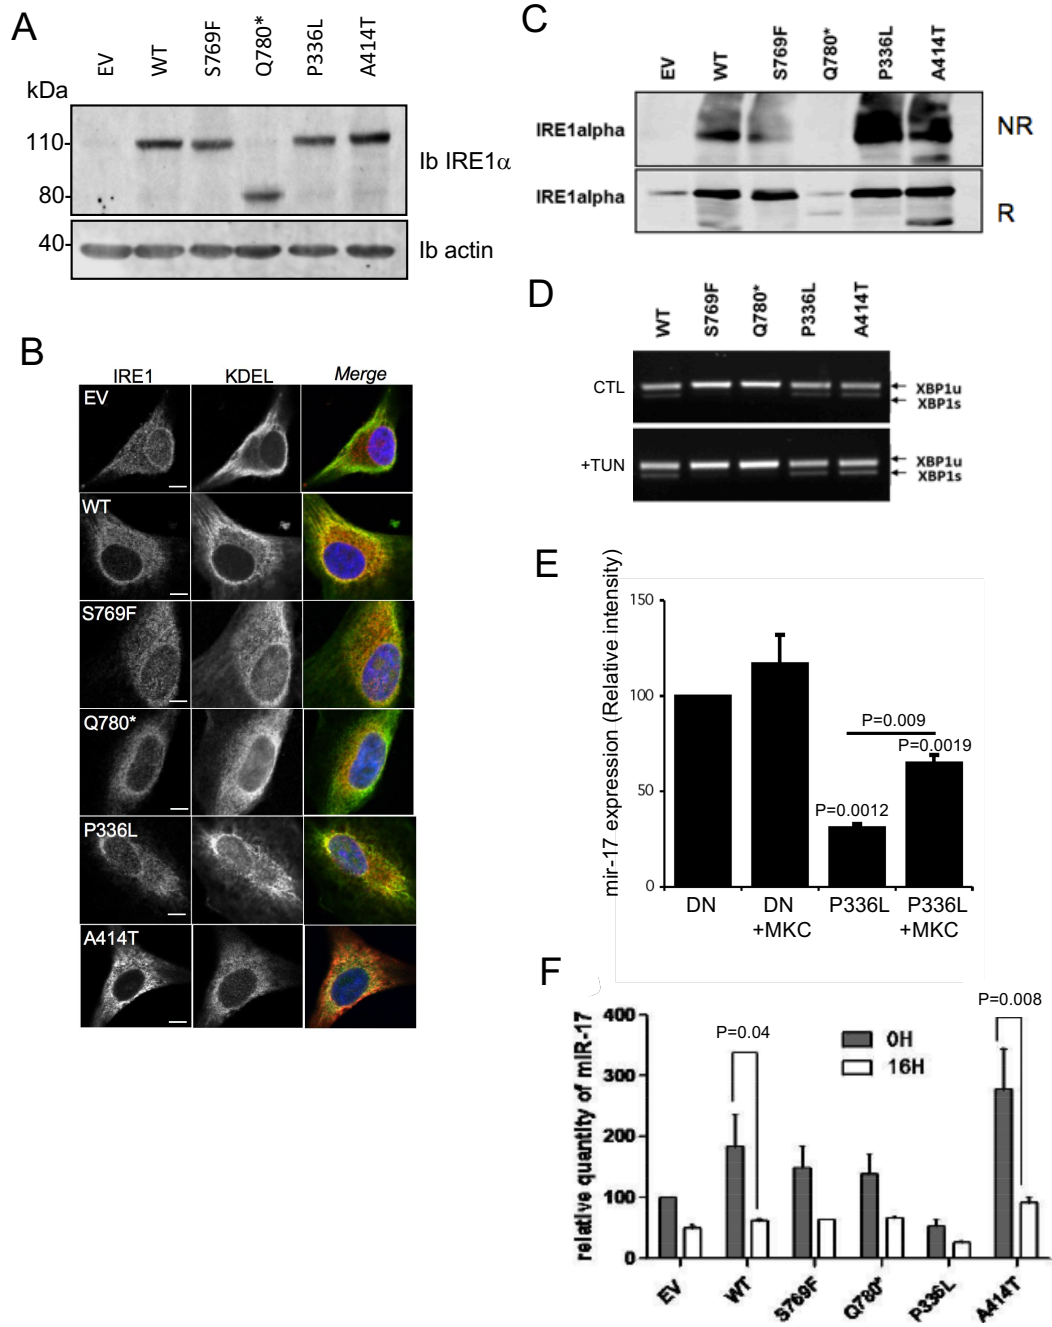

Figure S4



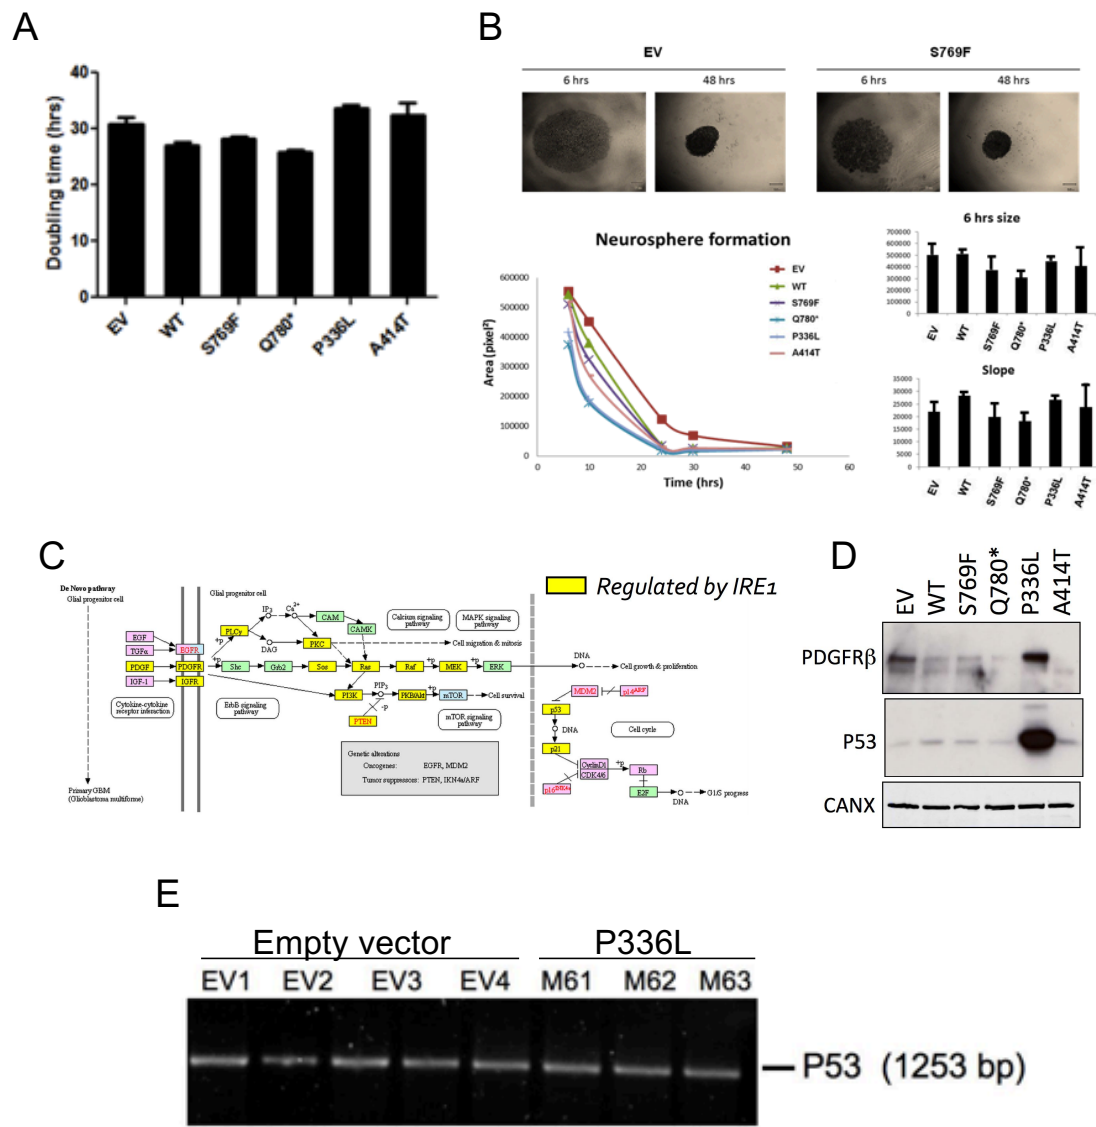

Figure S5

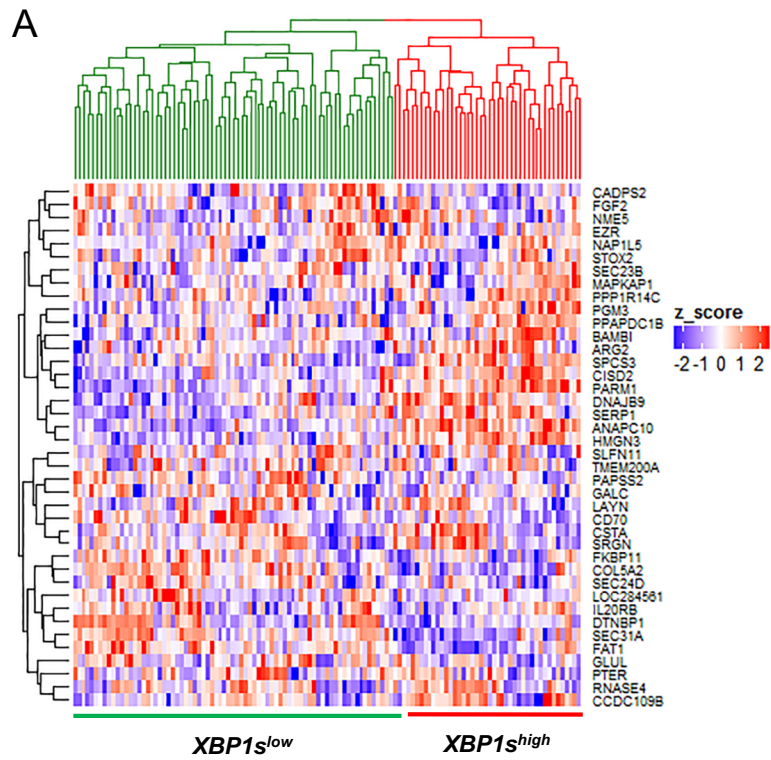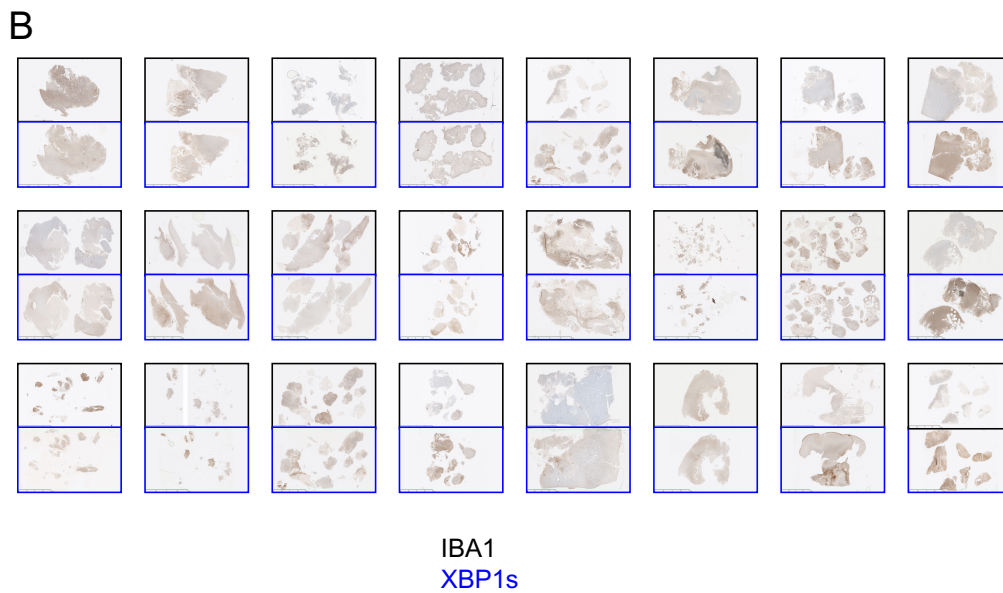

Figure S6

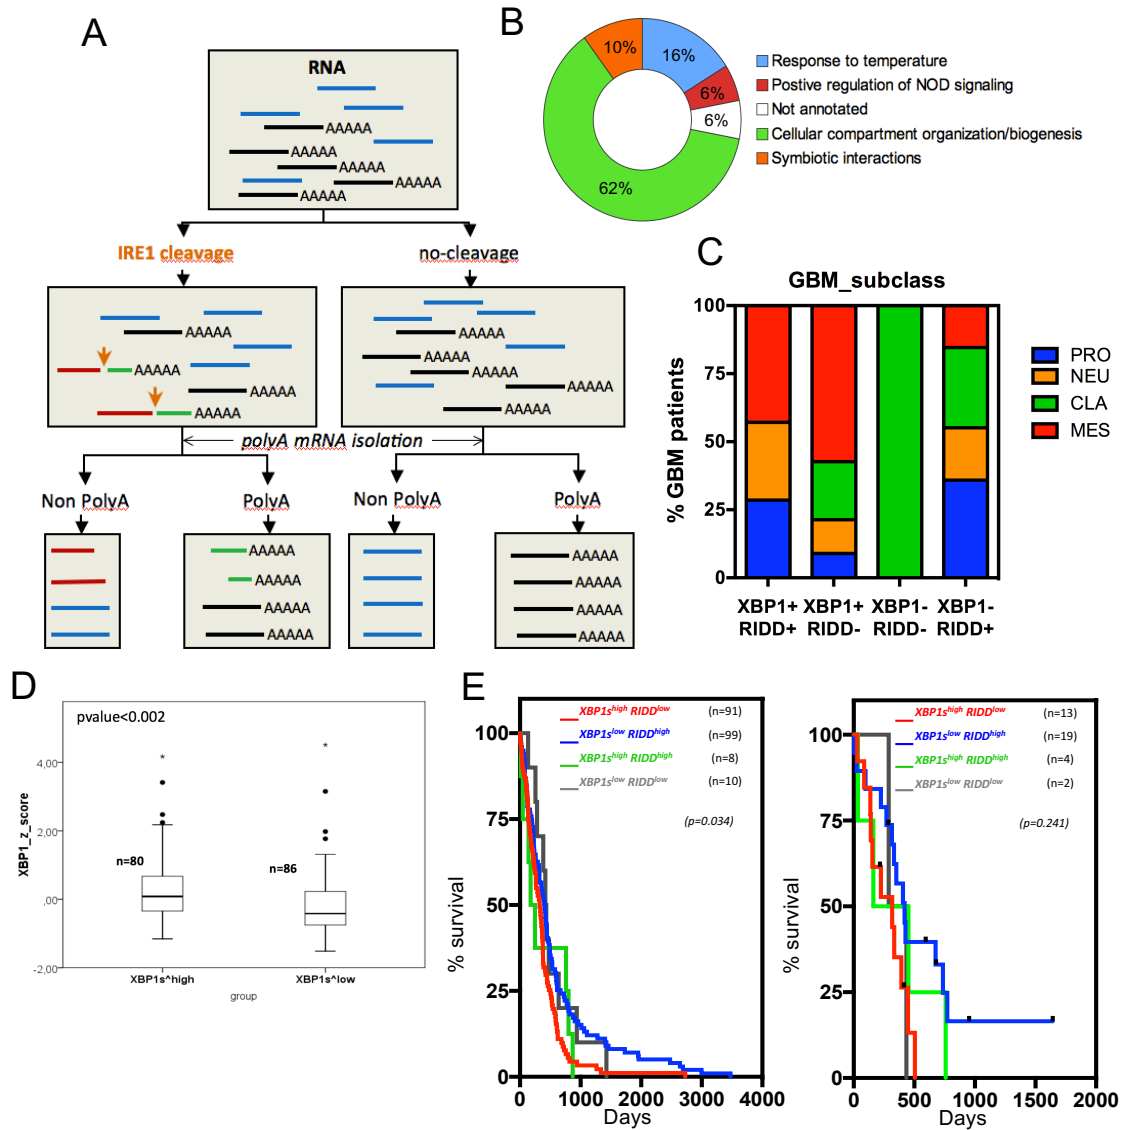

Figure S7

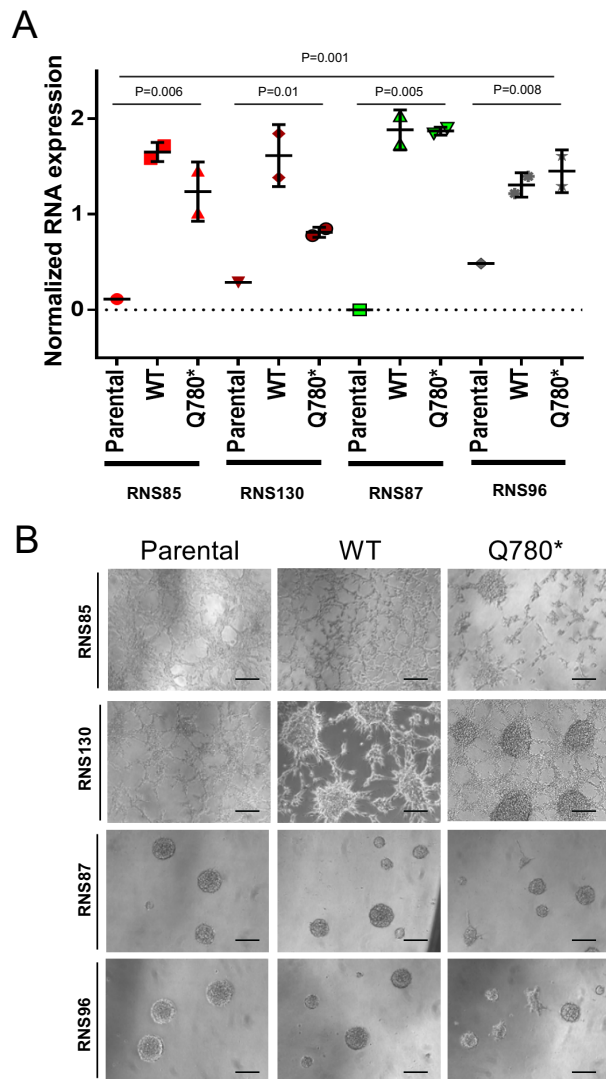

Figure S8
